# Supplementary material for: Chlorophyll fluorescence analysis in diverse rice varieties reveals the positive correlation between the seedlings salt tolerance and photosynthetic efficiency
Source: PubMed Central journal article supplement (PMC6743182; doi:10.1186/s12870-019-1983-8), 2019-09-13

# $F_0$ – whole panel

(a)

Naïve model

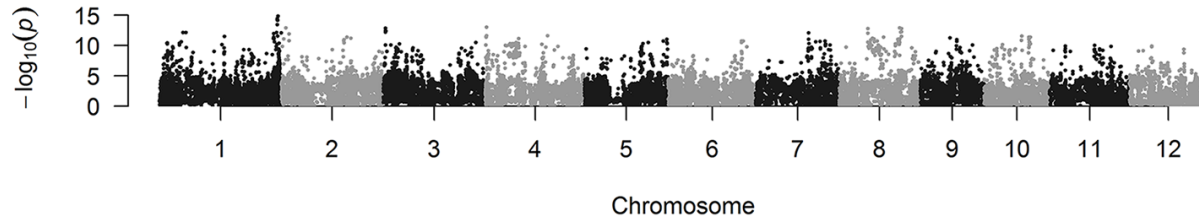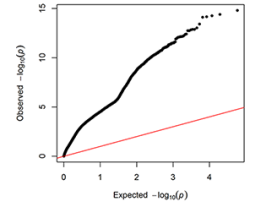

(b)

P model

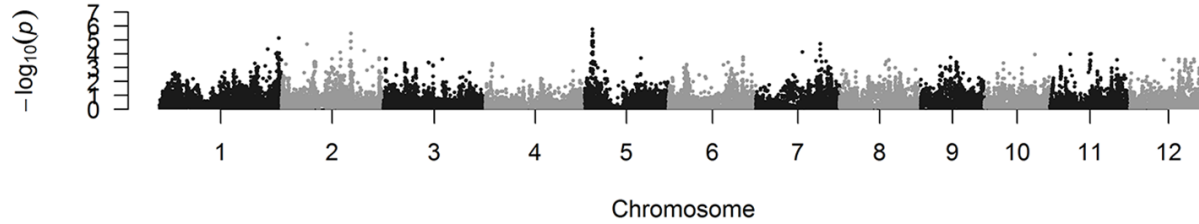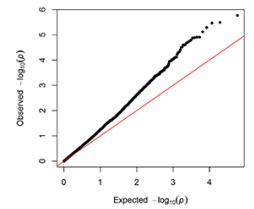

(c)

K model

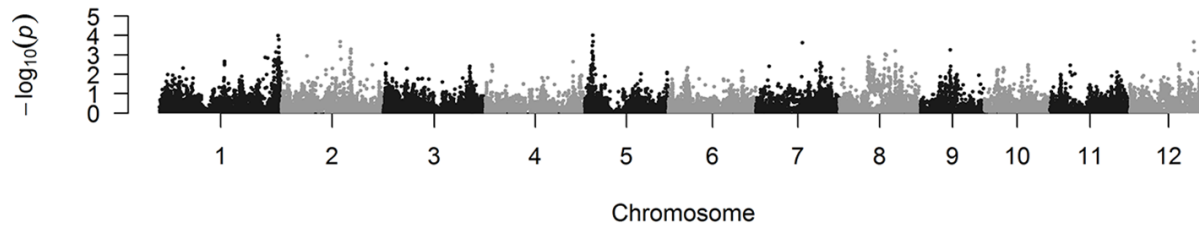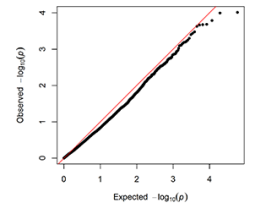

(d)

P+K model

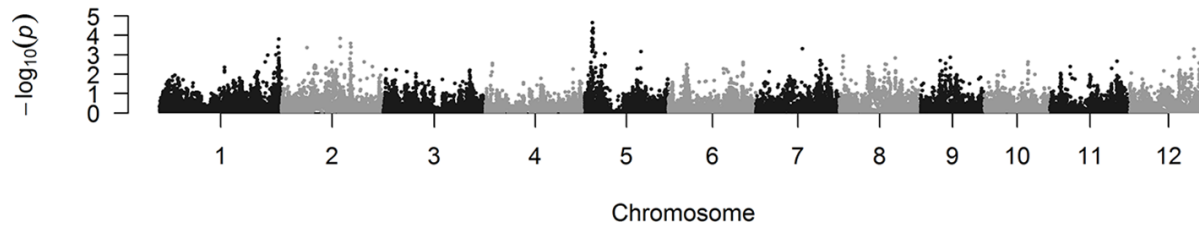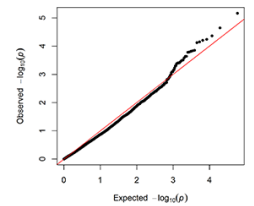

# $F_0$ -*Japonica* panel

(a)

Naïve model

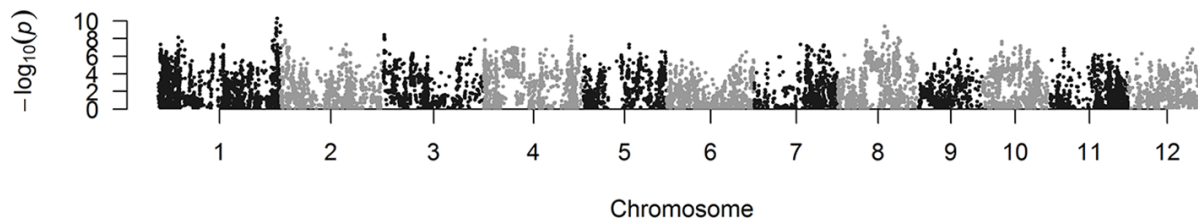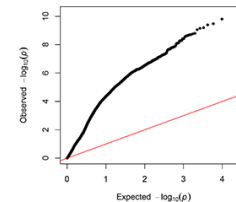

(b)

K model

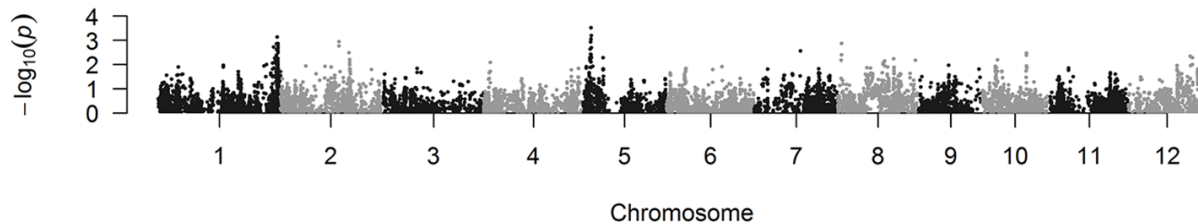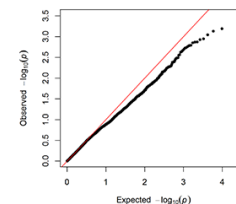

# $F_0$ -*Indica* panel

(c)

Naïve model

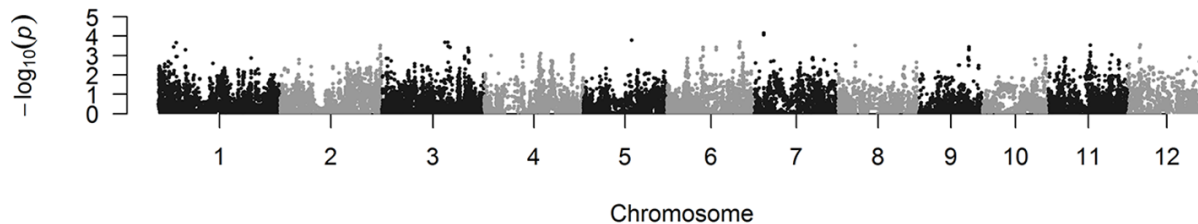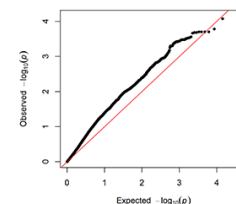

(d)

K model

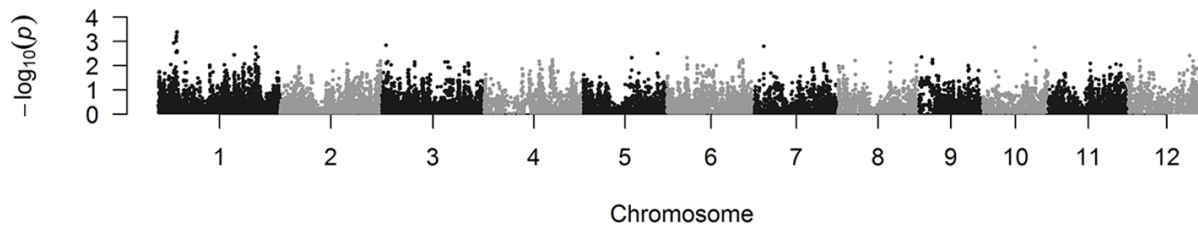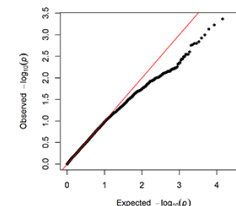

# $F_m$ – whole panel

(a)

Naïve model

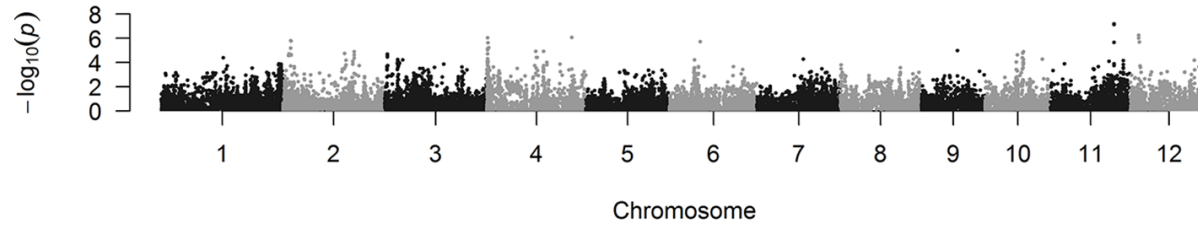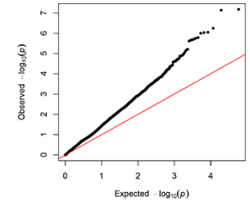

(b)

P model

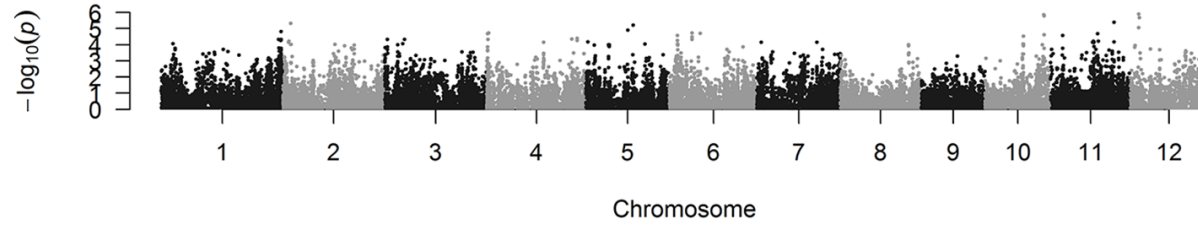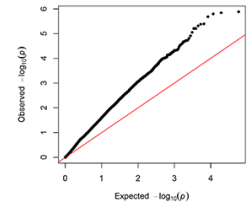

(c)

K model

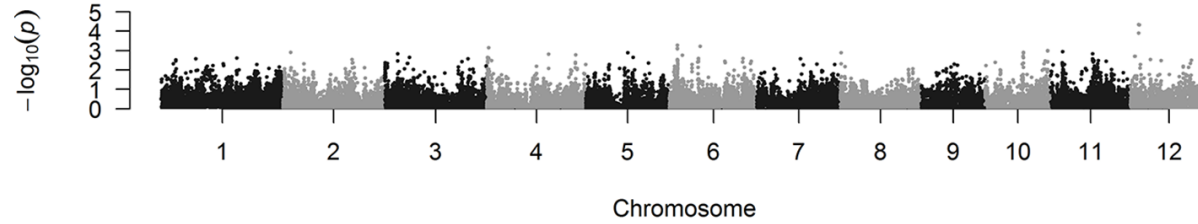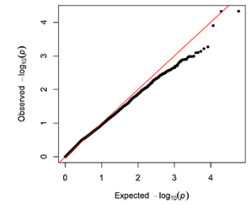

(d)

P+K model

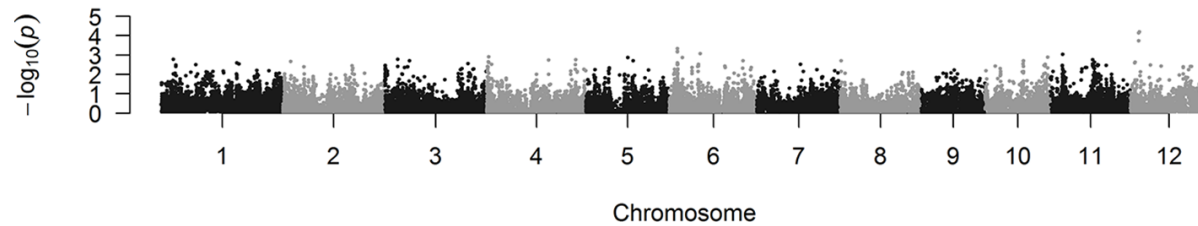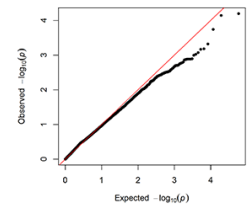

# Fm – *Japonica* panel

(a)

Naïve model

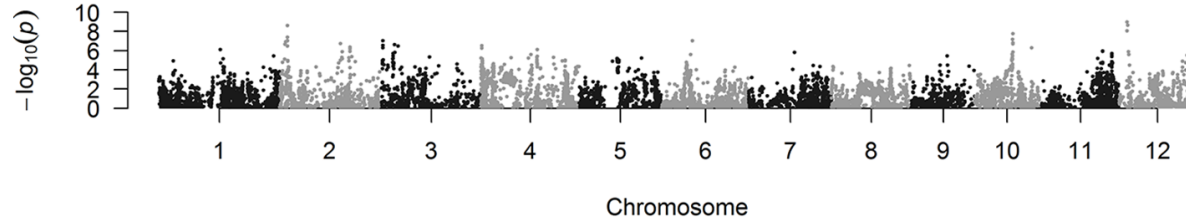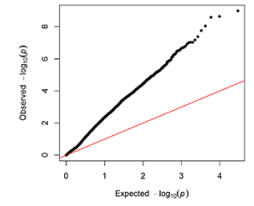

(b)

K model

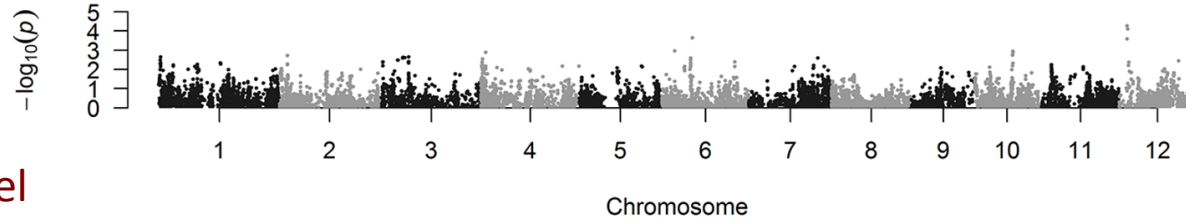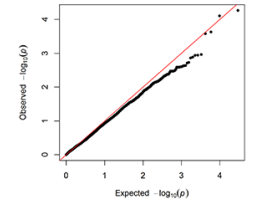

# Fm – *Indica* panel

(c)

Naïve model

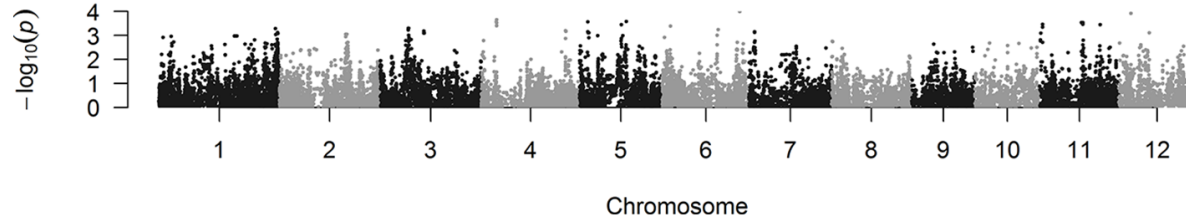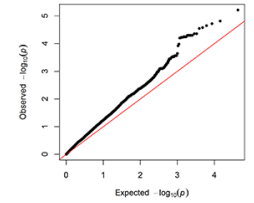

(d)

K model

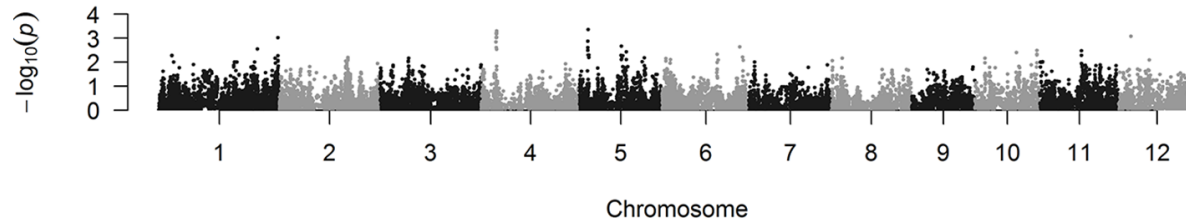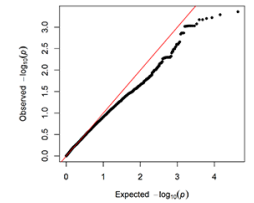

# $\Phi$ PSII – whole panel

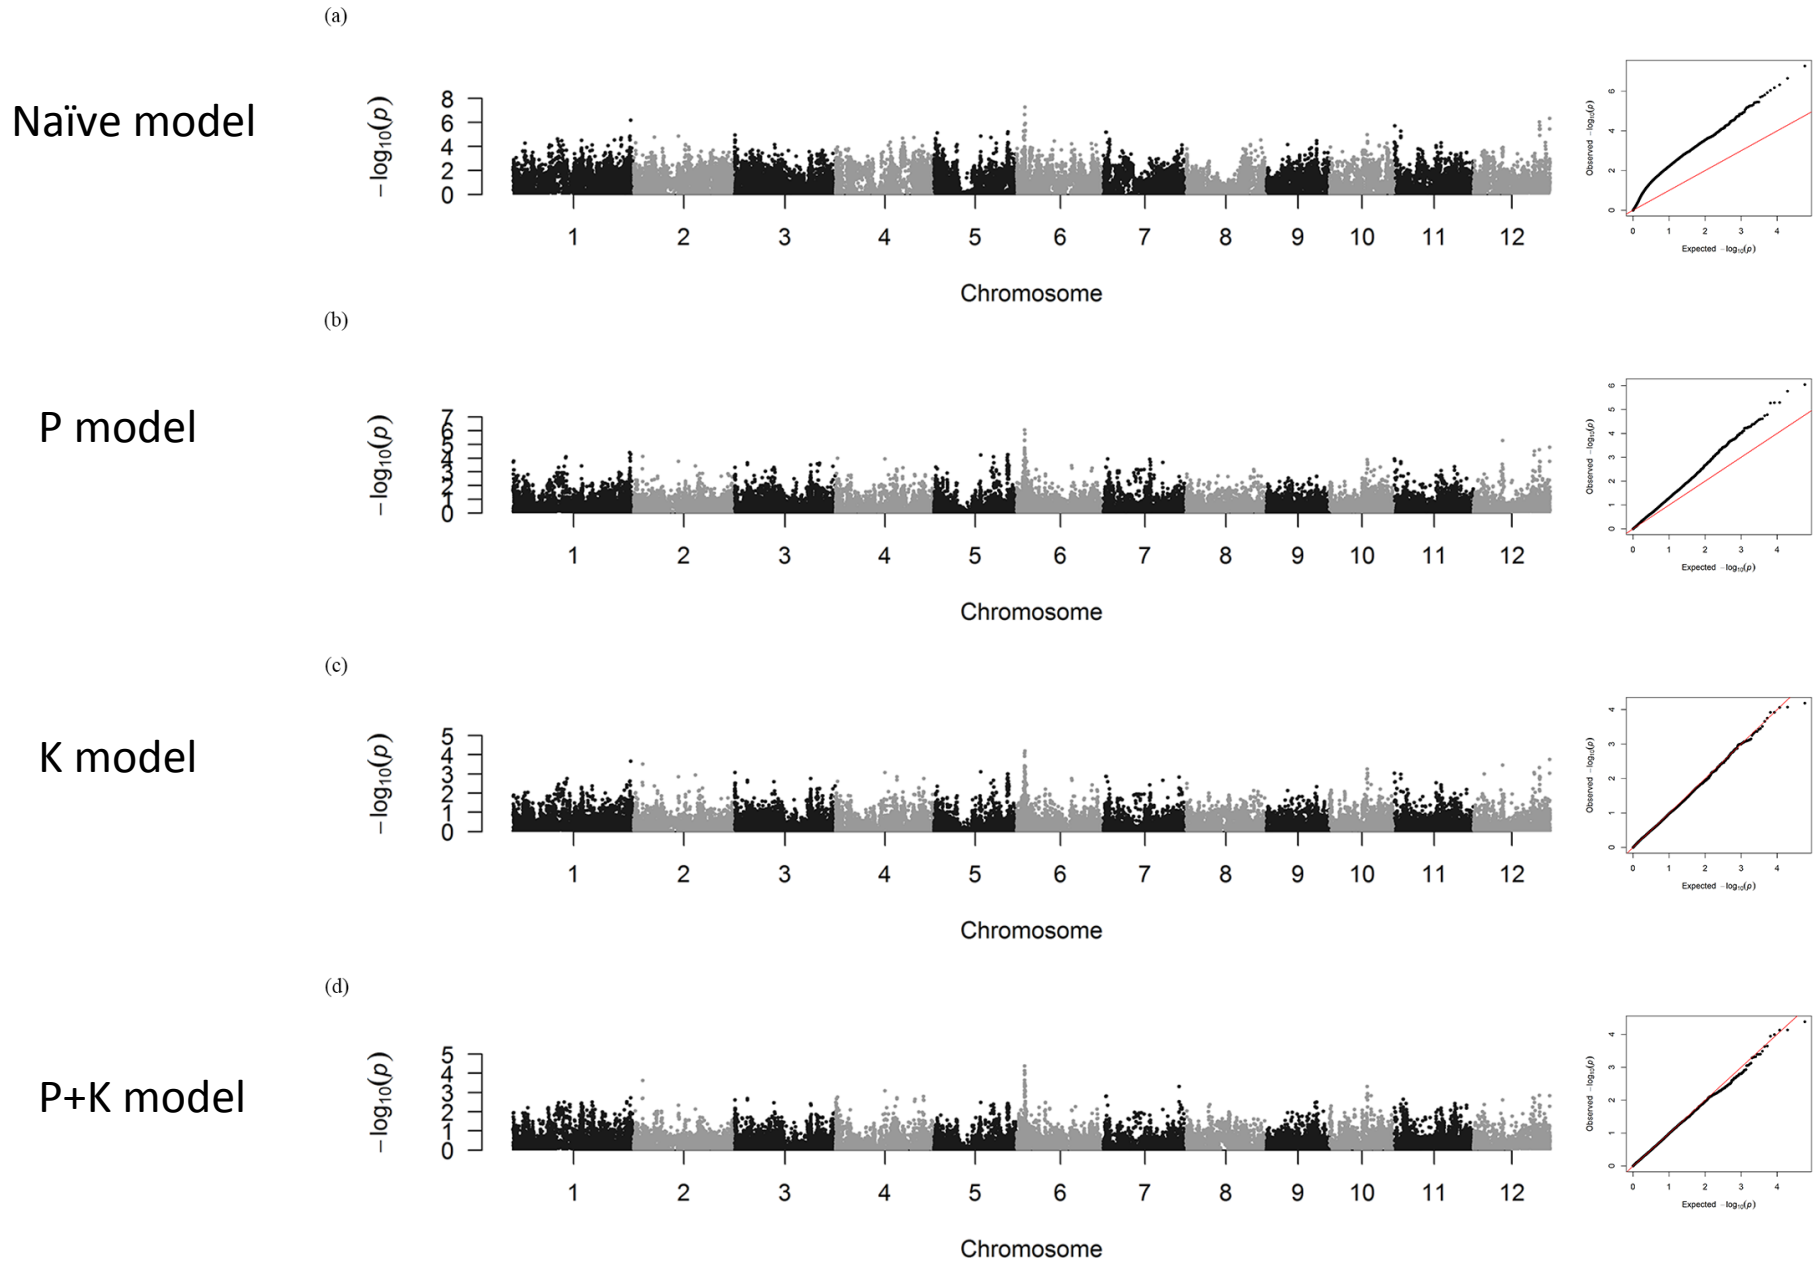

# $\Phi$ PSII-*Japonica* panel

(a)

Naïve model

$-\log_{10}(p)$   
5  
4  
3  
2  
1  
0

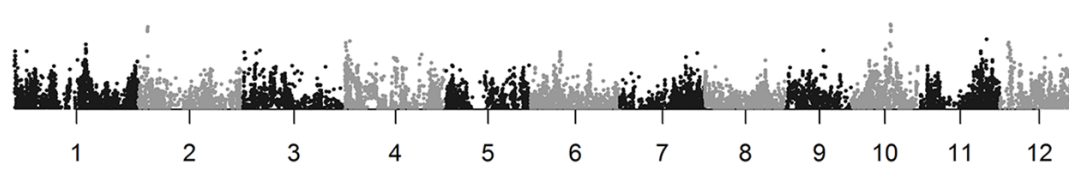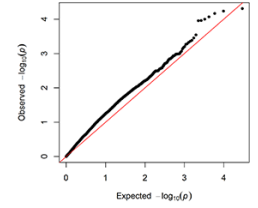

Chromosome

(b)

K model

$-\log_{10}(p)$   
4  
3  
2  
1  
0

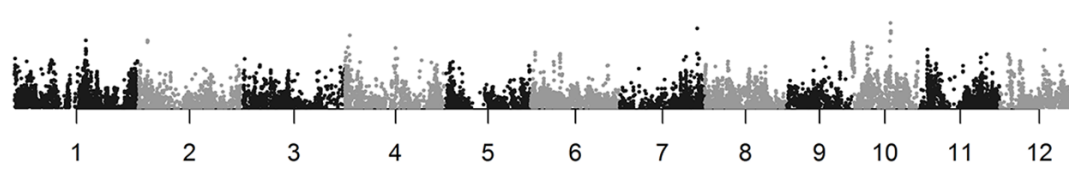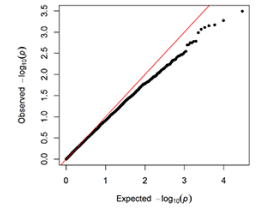

Chromosome

# $\Phi$ PSII-*indica* panel

(c)

Naïve model

$-\log_{10}(p)$   
7  
6  
5  
4  
3  
2  
1  
0

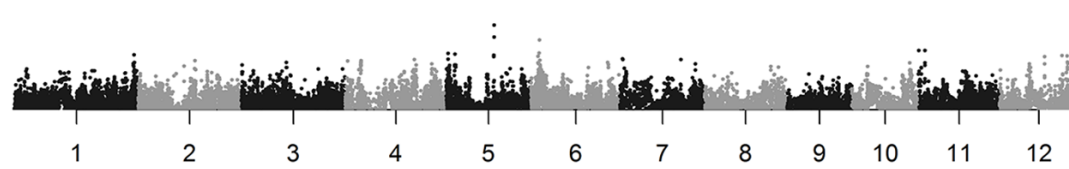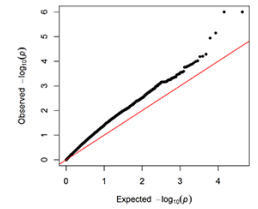

Chromosome

(d)

K model

$-\log_{10}(p)$   
4  
3  
2  
1  
0

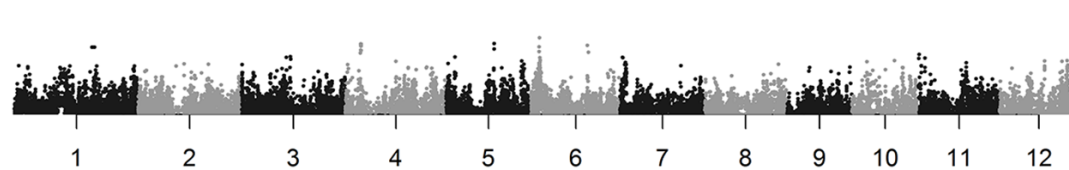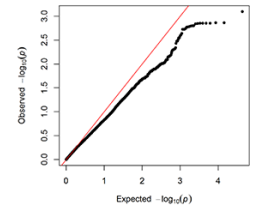

Chromosome

# qL-whole panel

(a)

Naïve model

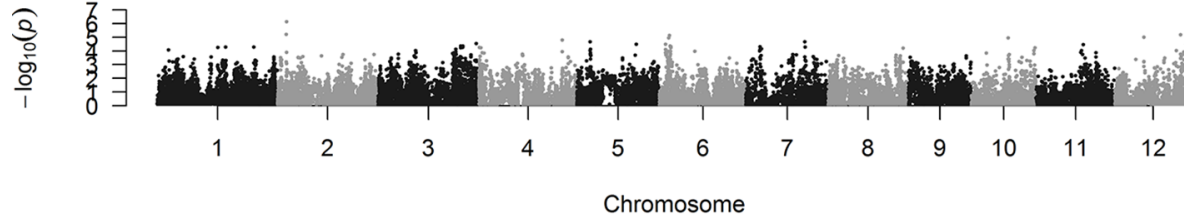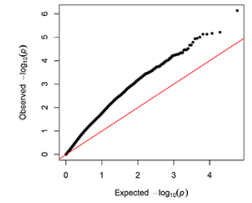

(b)

P model

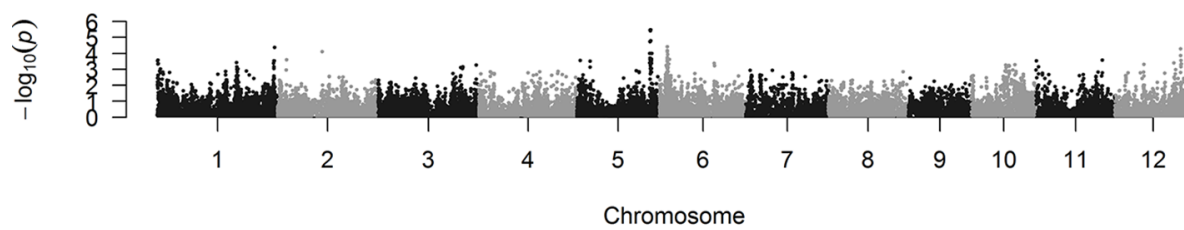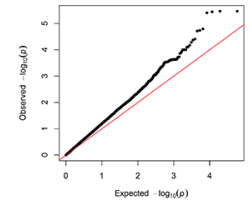

(c)

K model

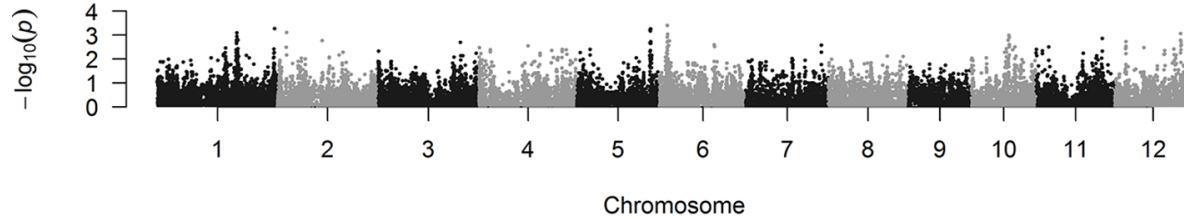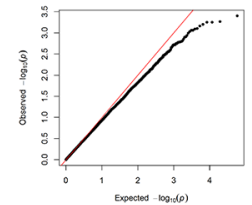

(d)

P+K model

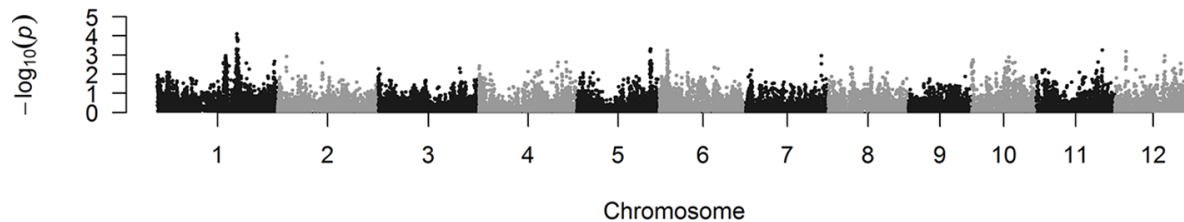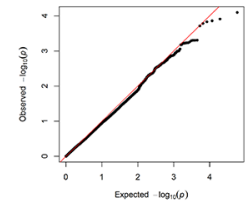

# qL- *Japonica* panel

(a)

Naïve model

$-\log_{10}(\rho)$

5  
4  
3  
2  
1  
0

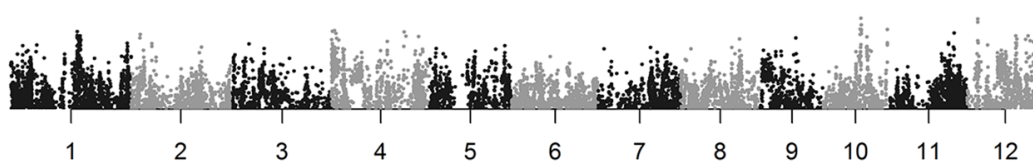

Chromosome

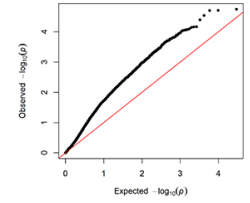

(b)

K model

$-\log_{10}(\rho)$

4  
3  
2  
1  
0

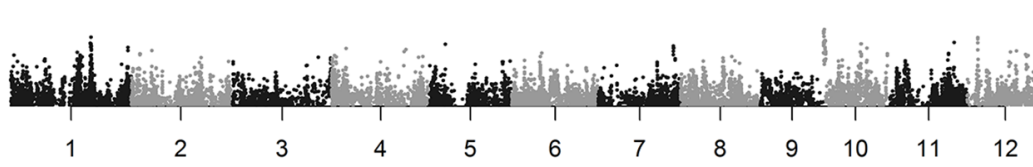

Chromosome

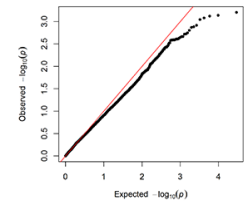

# qL- *Indica* panel

(c)

Naïve model

$-\log_{10}(\rho)$

6  
5  
4  
3  
2  
1  
0

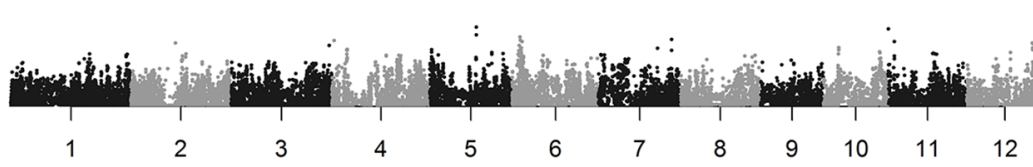

Chromosome

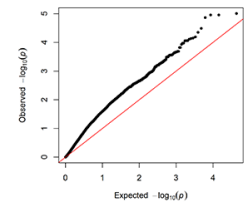

(d)

K model

$-\log_{10}(\rho)$

4  
3  
2  
1  
0

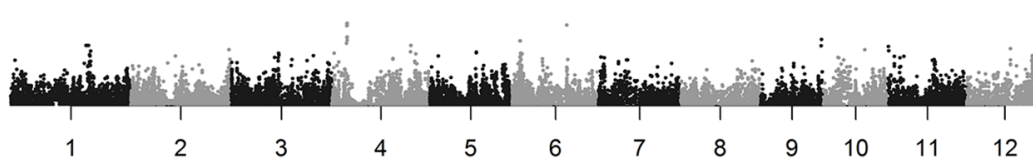

Chromosome

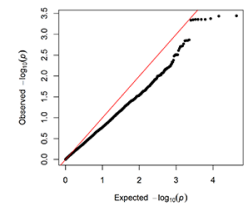



# NPQ- whole panel

(a)

Naïve model

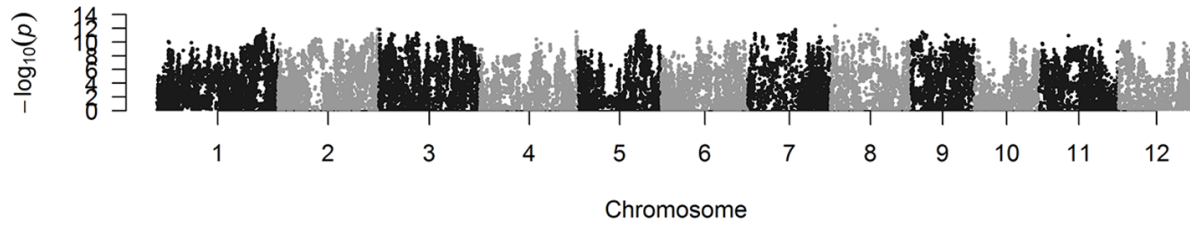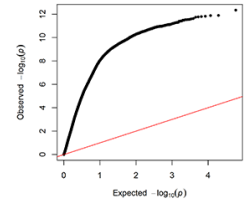

(b)

P model

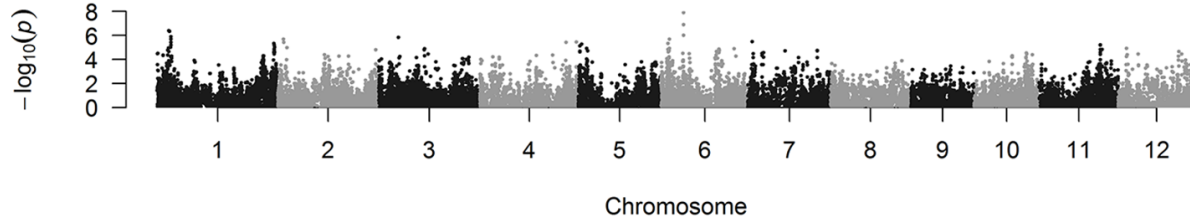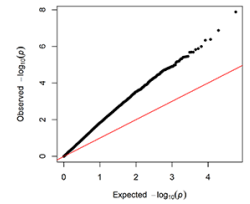

(c)

K model

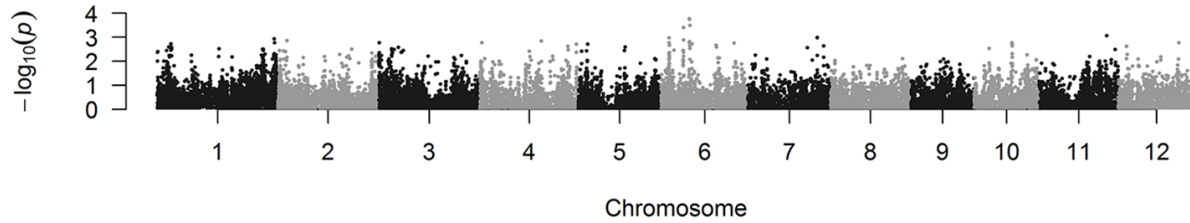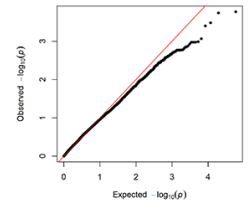

(d)

P+K model

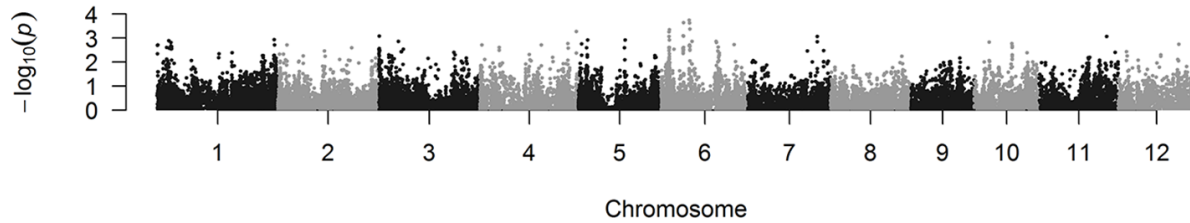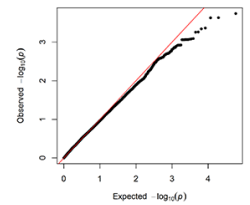

## NPQ- *Japonica* panel

(a)

Naïve model

$-\log_{10}(\rho)$

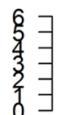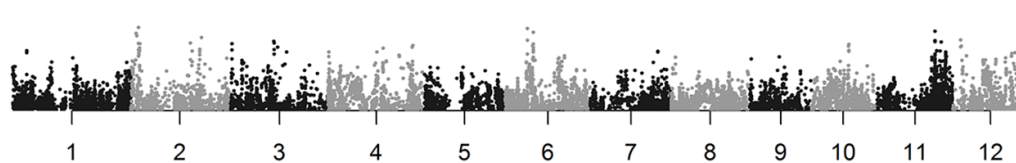

Chromosome

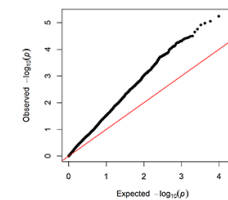

(b)

K model

$-\log_{10}(\rho)$

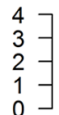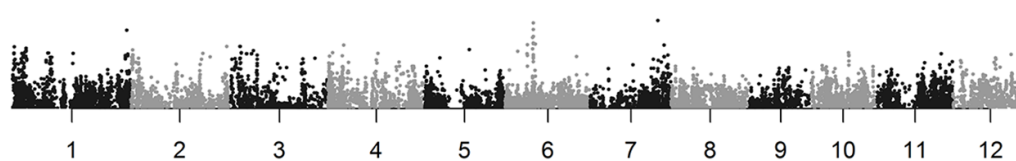

Chromosome

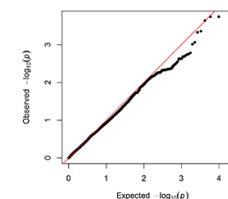

## NPQ- *Indica* panel

(c)

Naïve model

$-\log_{10}(\rho)$

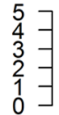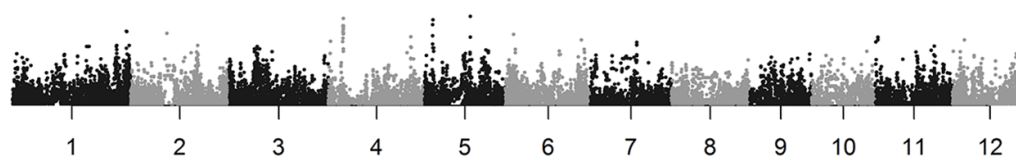

Chromosome

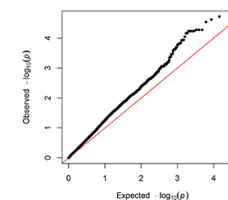

(d)

K model

$-\log_{10}(\rho)$

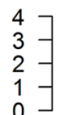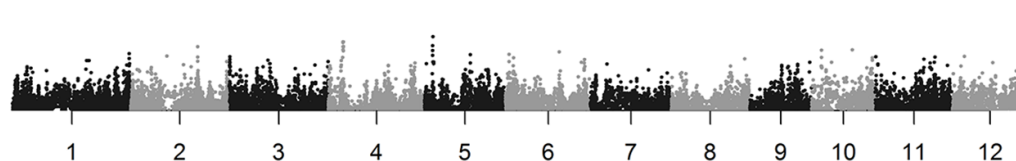

Chromosome

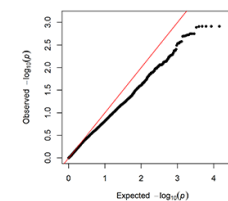

Supplement: 12870_2019_1983_MOESM12_ESM.pdf [file 12870_2019_1983_MOESM12_ESM.pdf]
