# Supplementary material for: Chlorophyll fluorescence analysis in diverse rice varieties reveals the positive correlation between the seedlings salt tolerance and photosynthetic efficiency
Source: PubMed Central journal article supplement (PMC6743182; doi:10.1186/s12870-019-1983-8), 2019-09-13

(a)

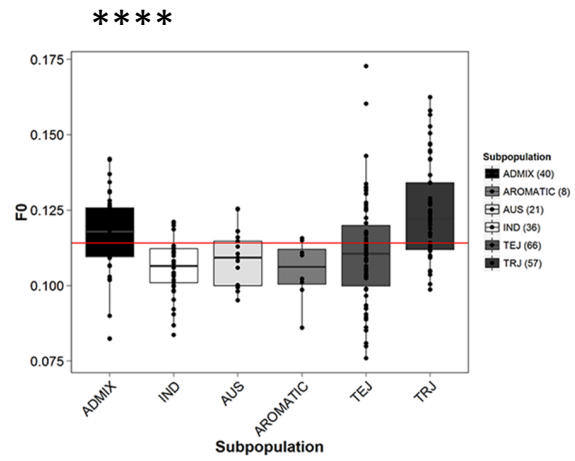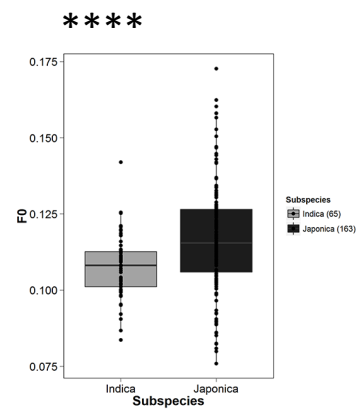

(b)

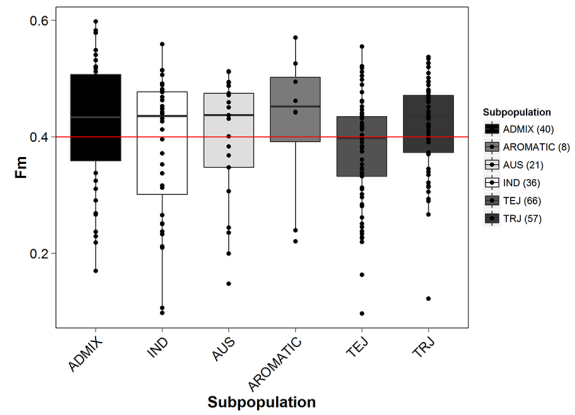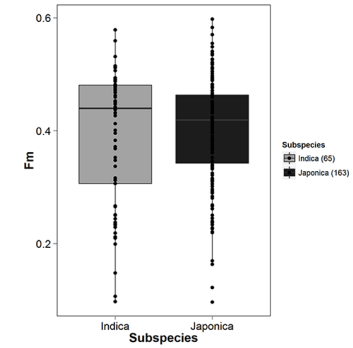

(c)

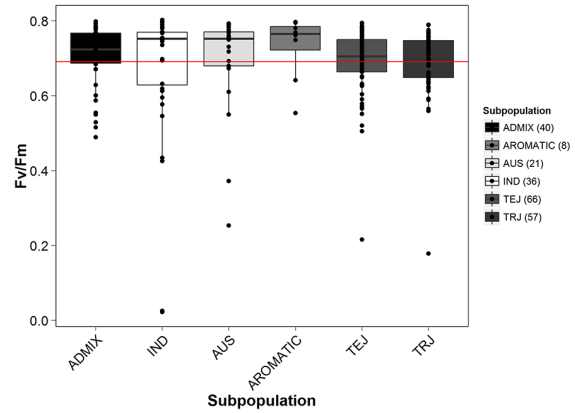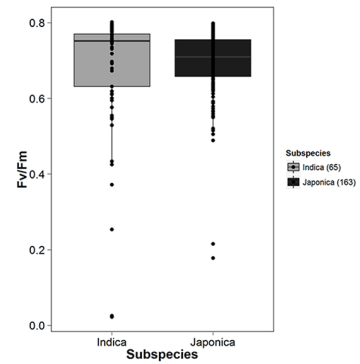

(d)

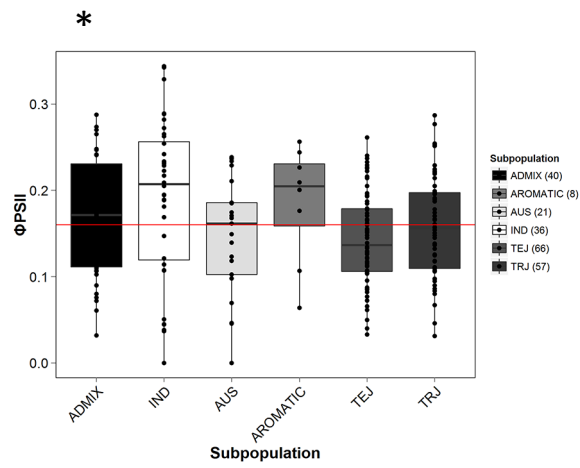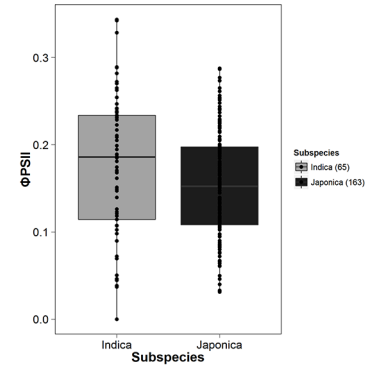

(e)

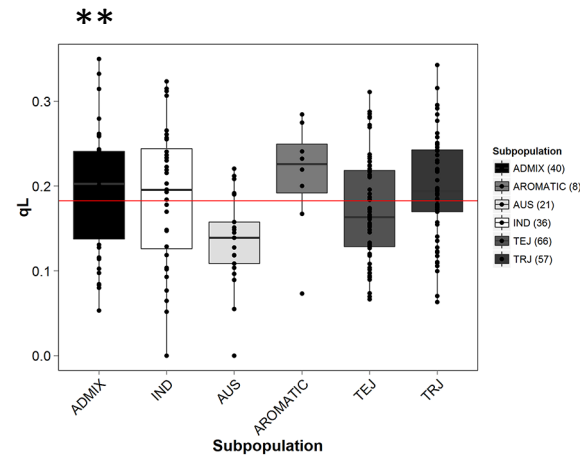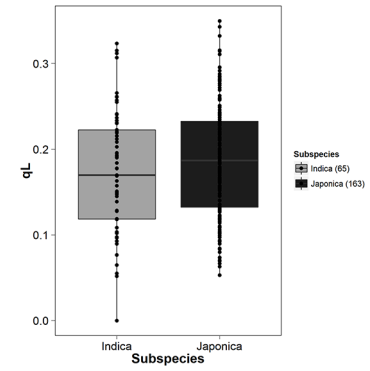

(f)

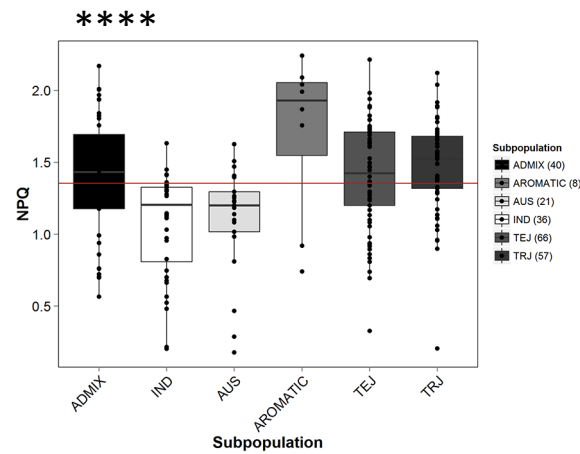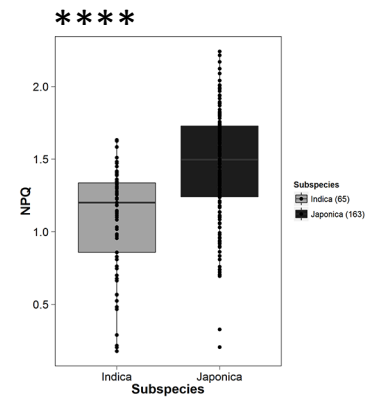

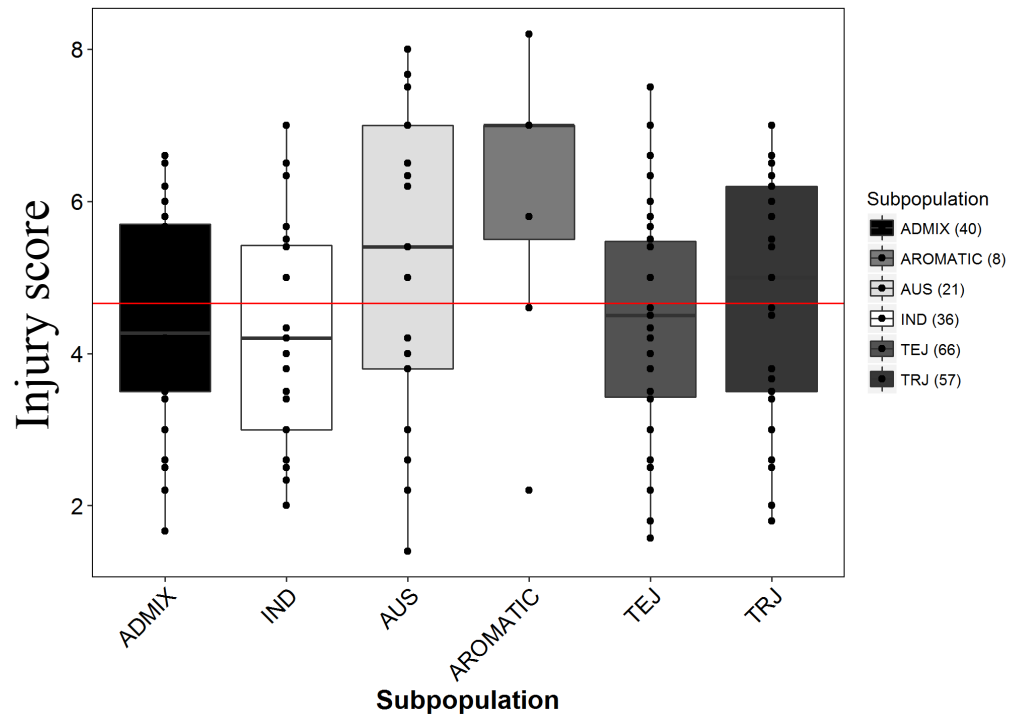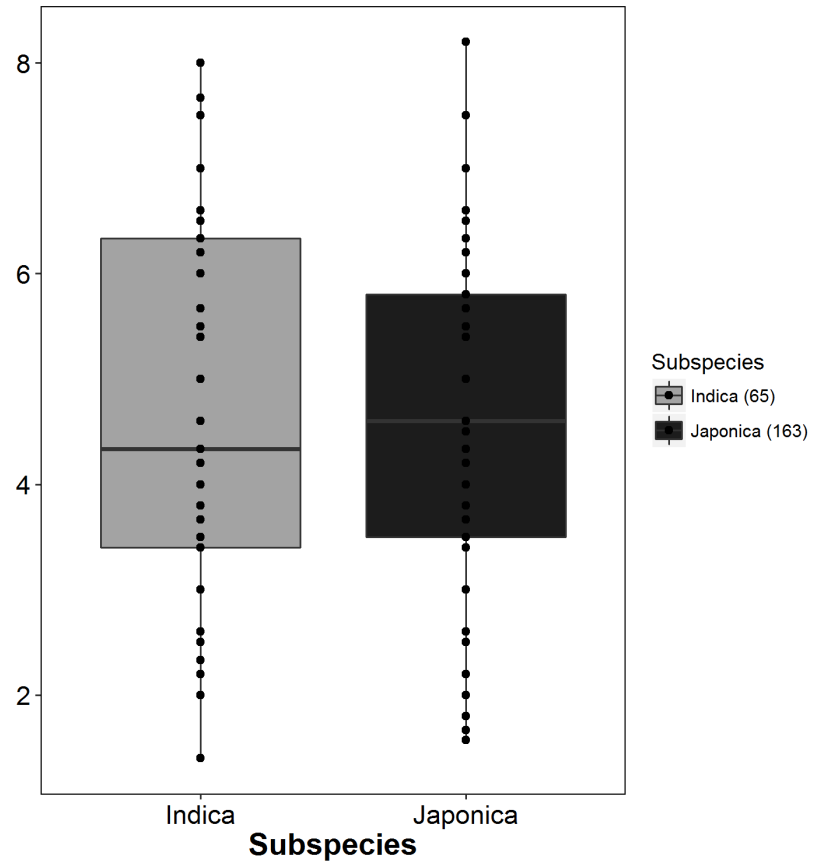

Supplement: 12870_2019_1983_MOESM8_ESM.pdf [file 12870_2019_1983_MOESM8_ESM.pdf]
