# Supplementary material for: Chlorophyll fluorescence analysis in diverse rice varieties reveals the positive correlation between the seedlings salt tolerance and photosynthetic efficiency
Source: PubMed Central journal article supplement (PMC6743182; doi:10.1186/s12870-019-1983-8), 2019-09-13

*Tropical japonica*

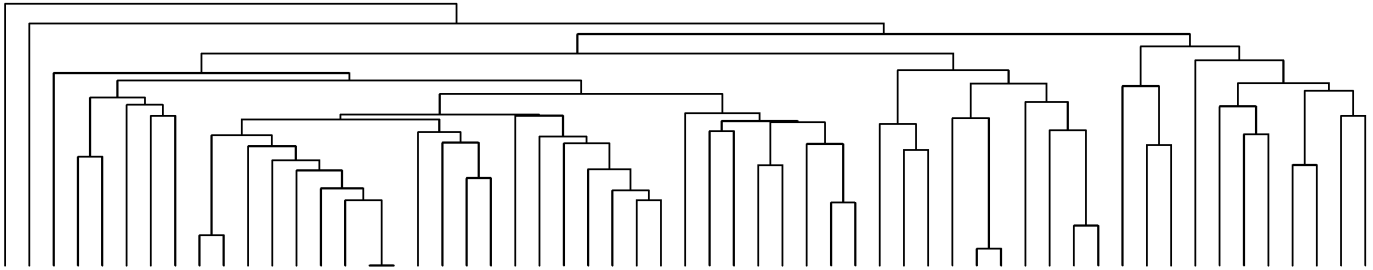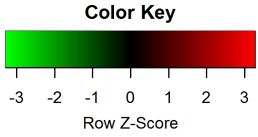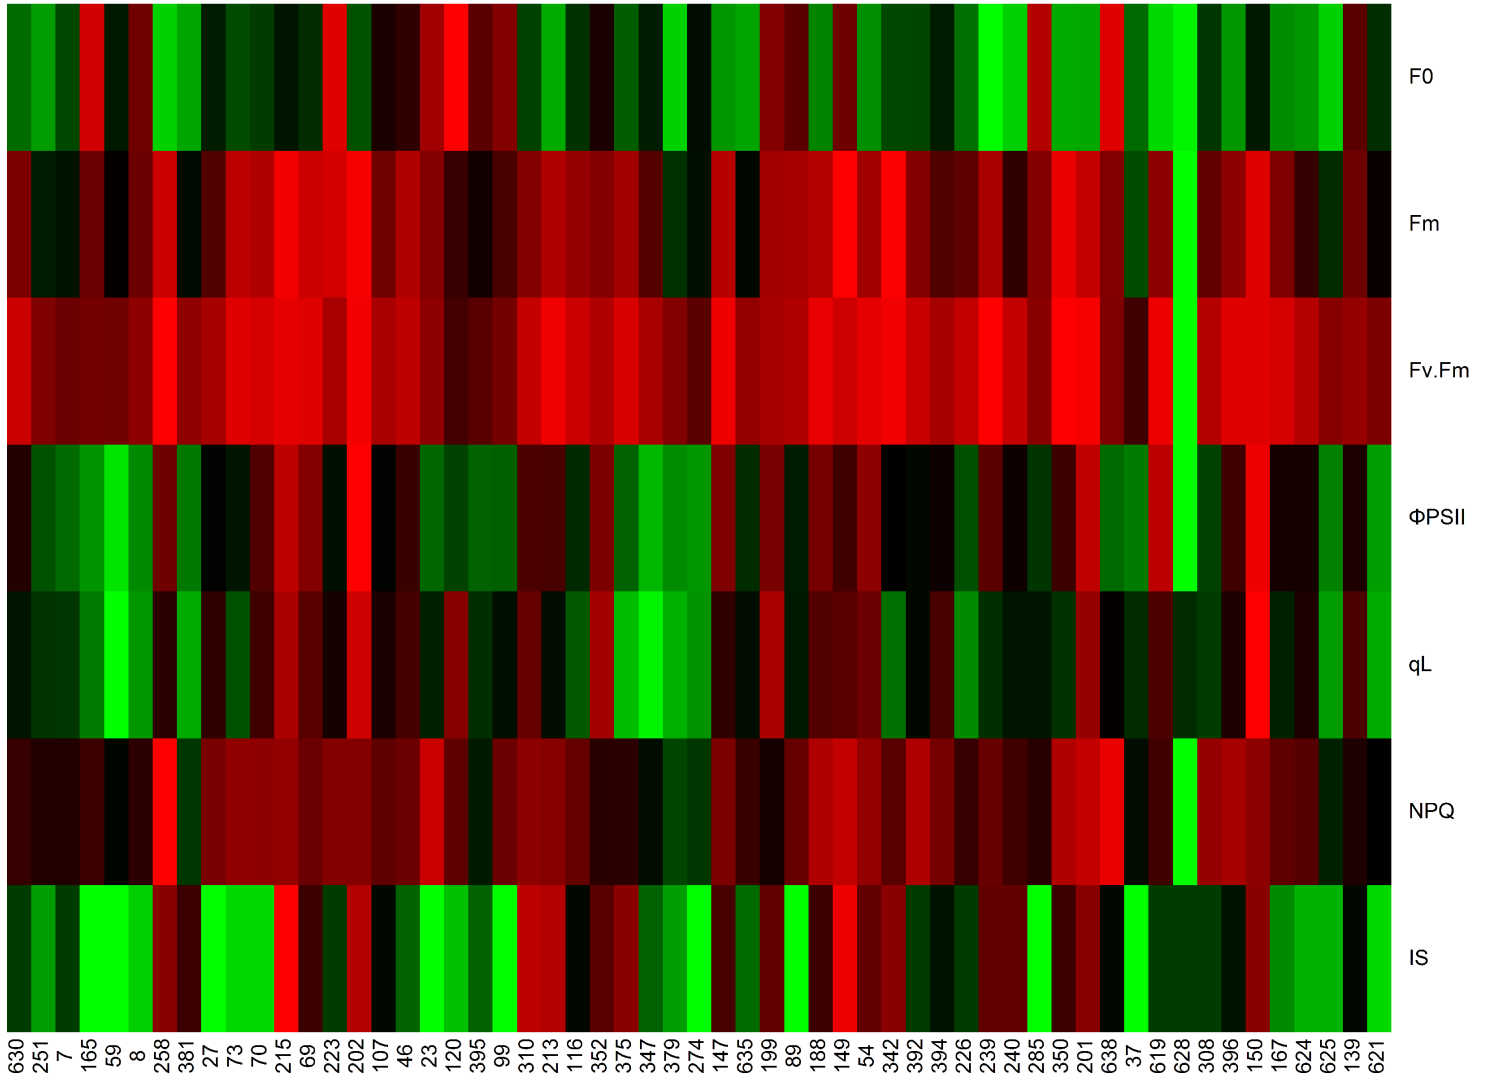

*Aromatic*

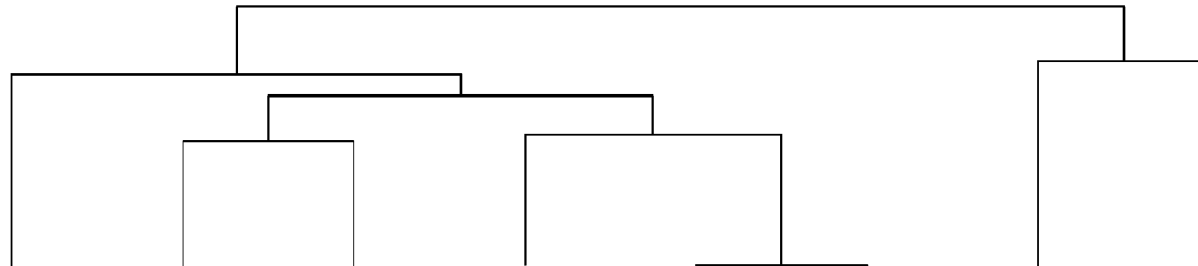

Color Key

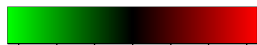

-3 -2 -1 0 1 2 3  
Row Z-Score

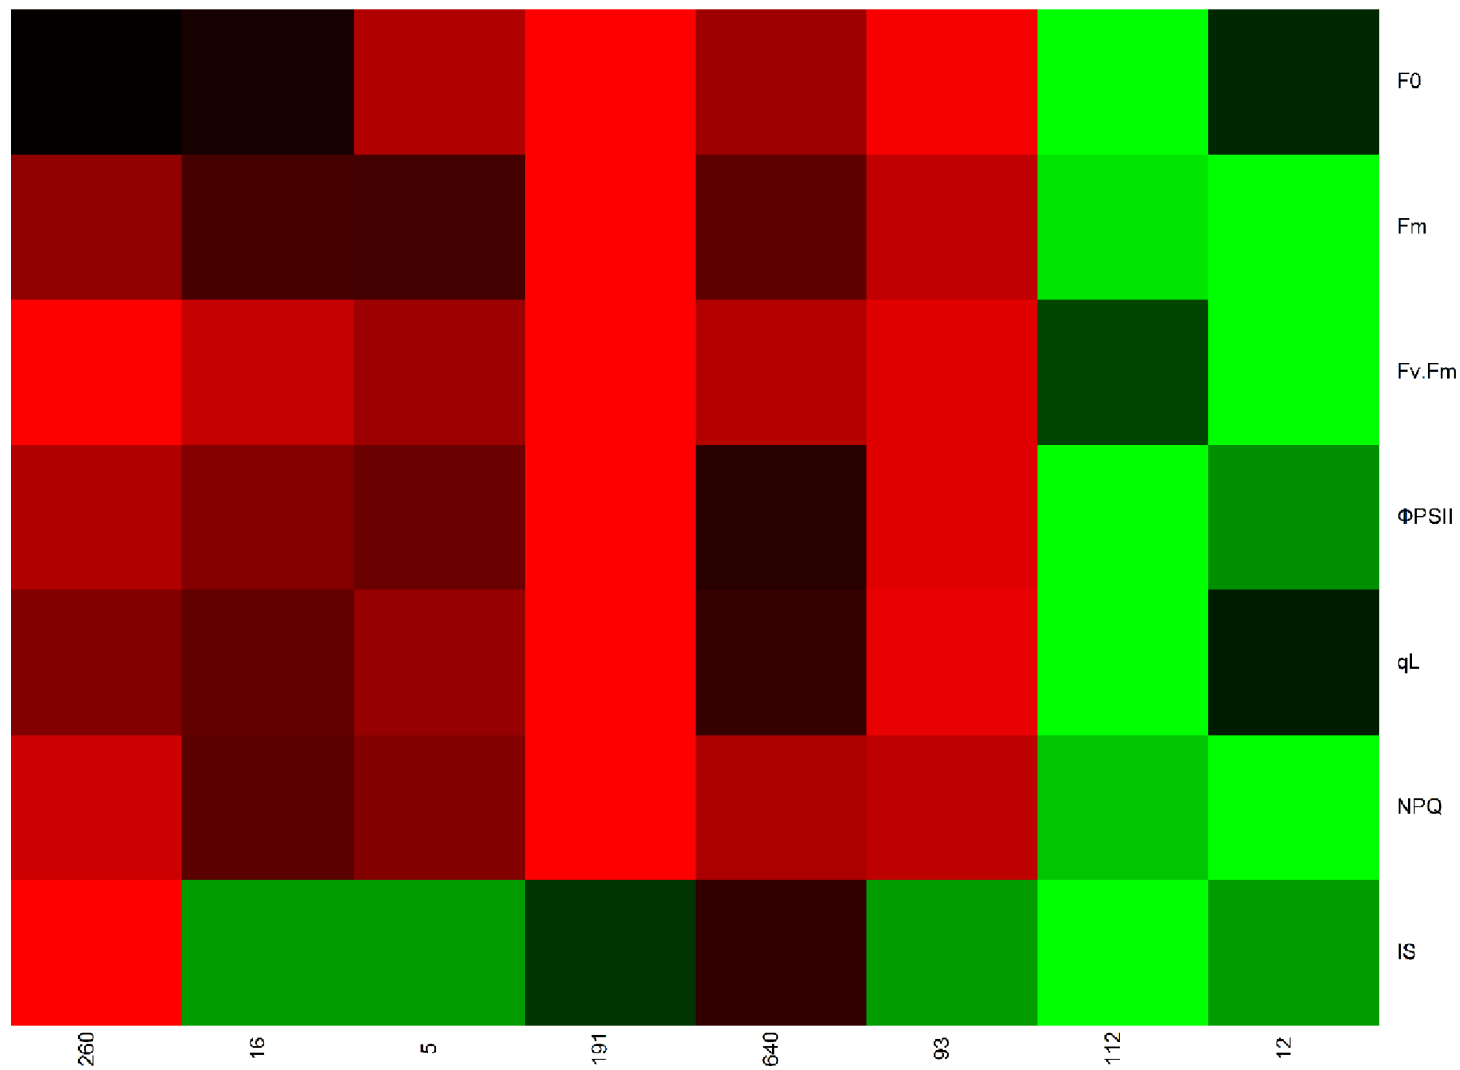

*Indica*

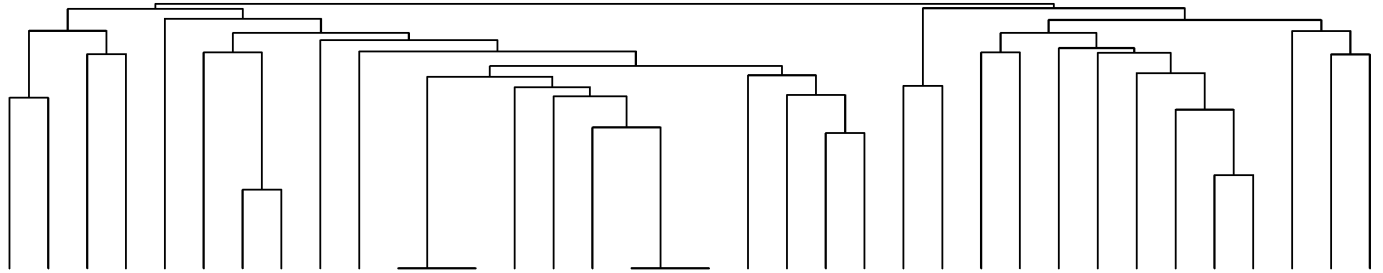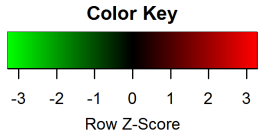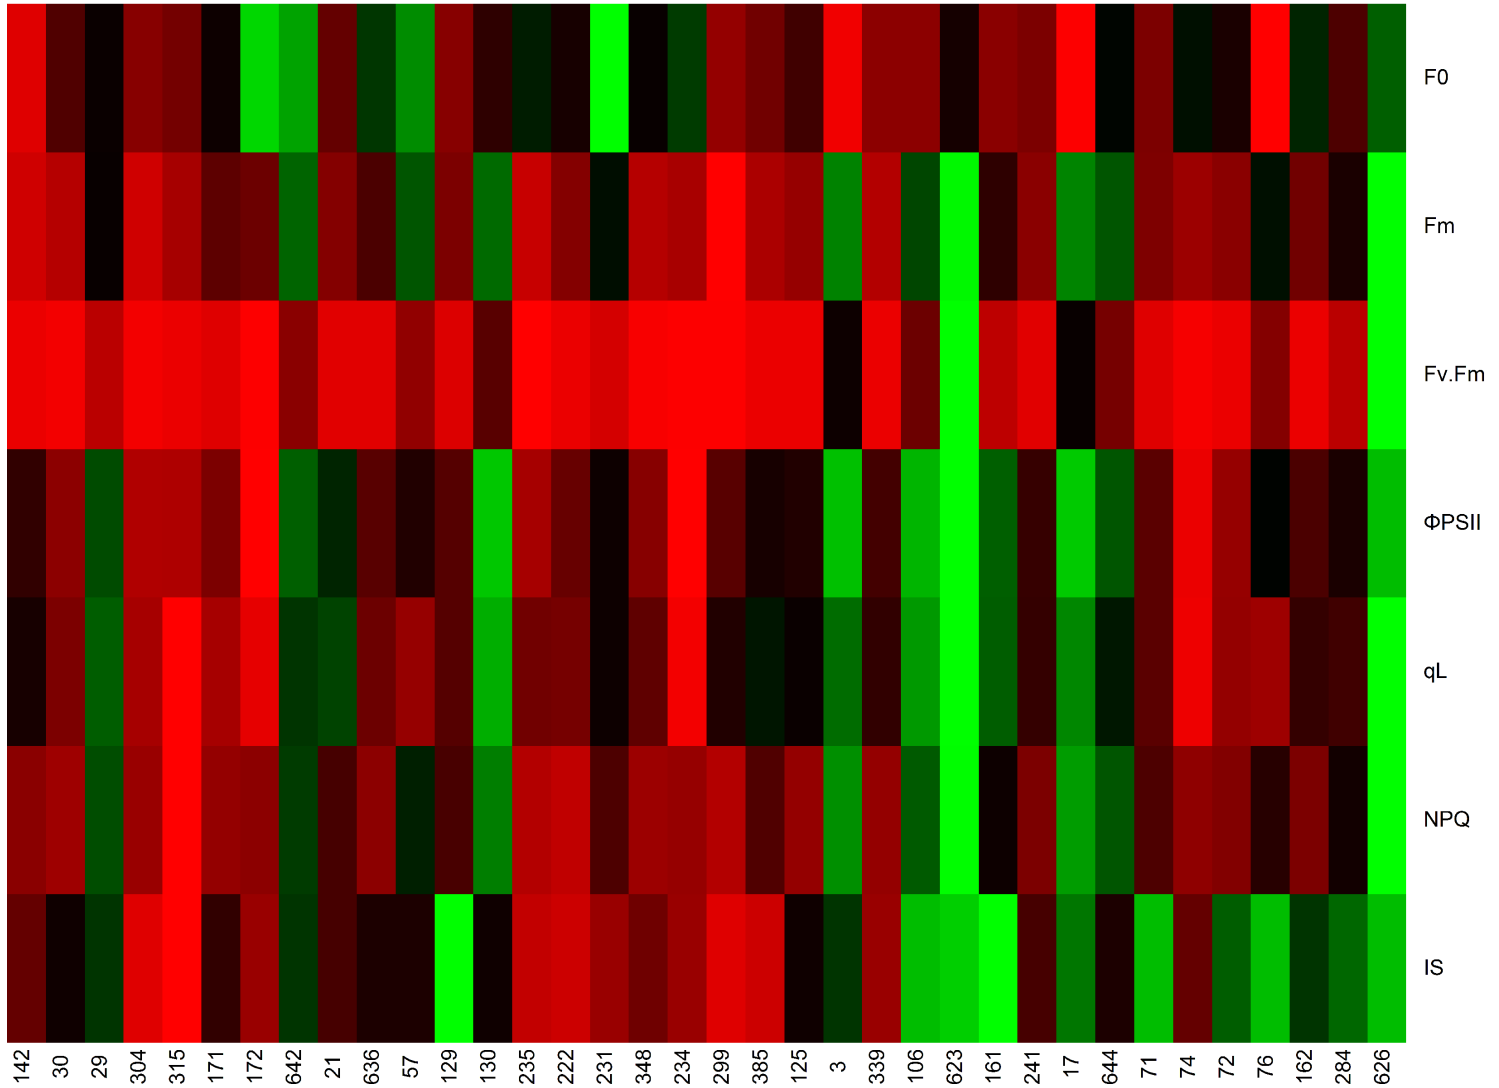

*Aus*

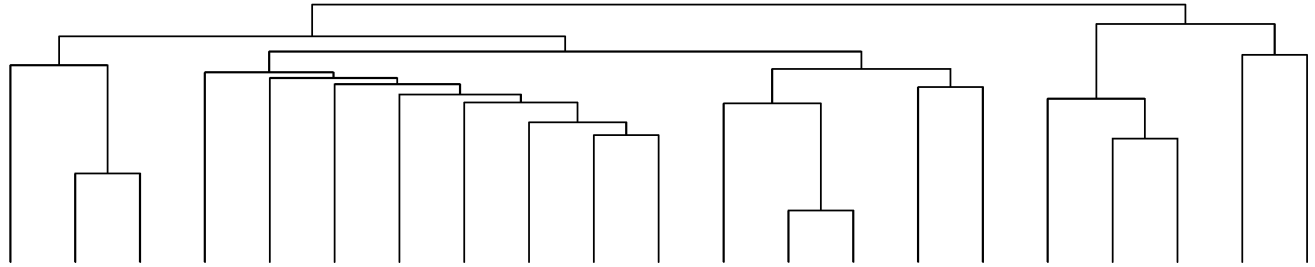

Color Key

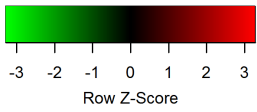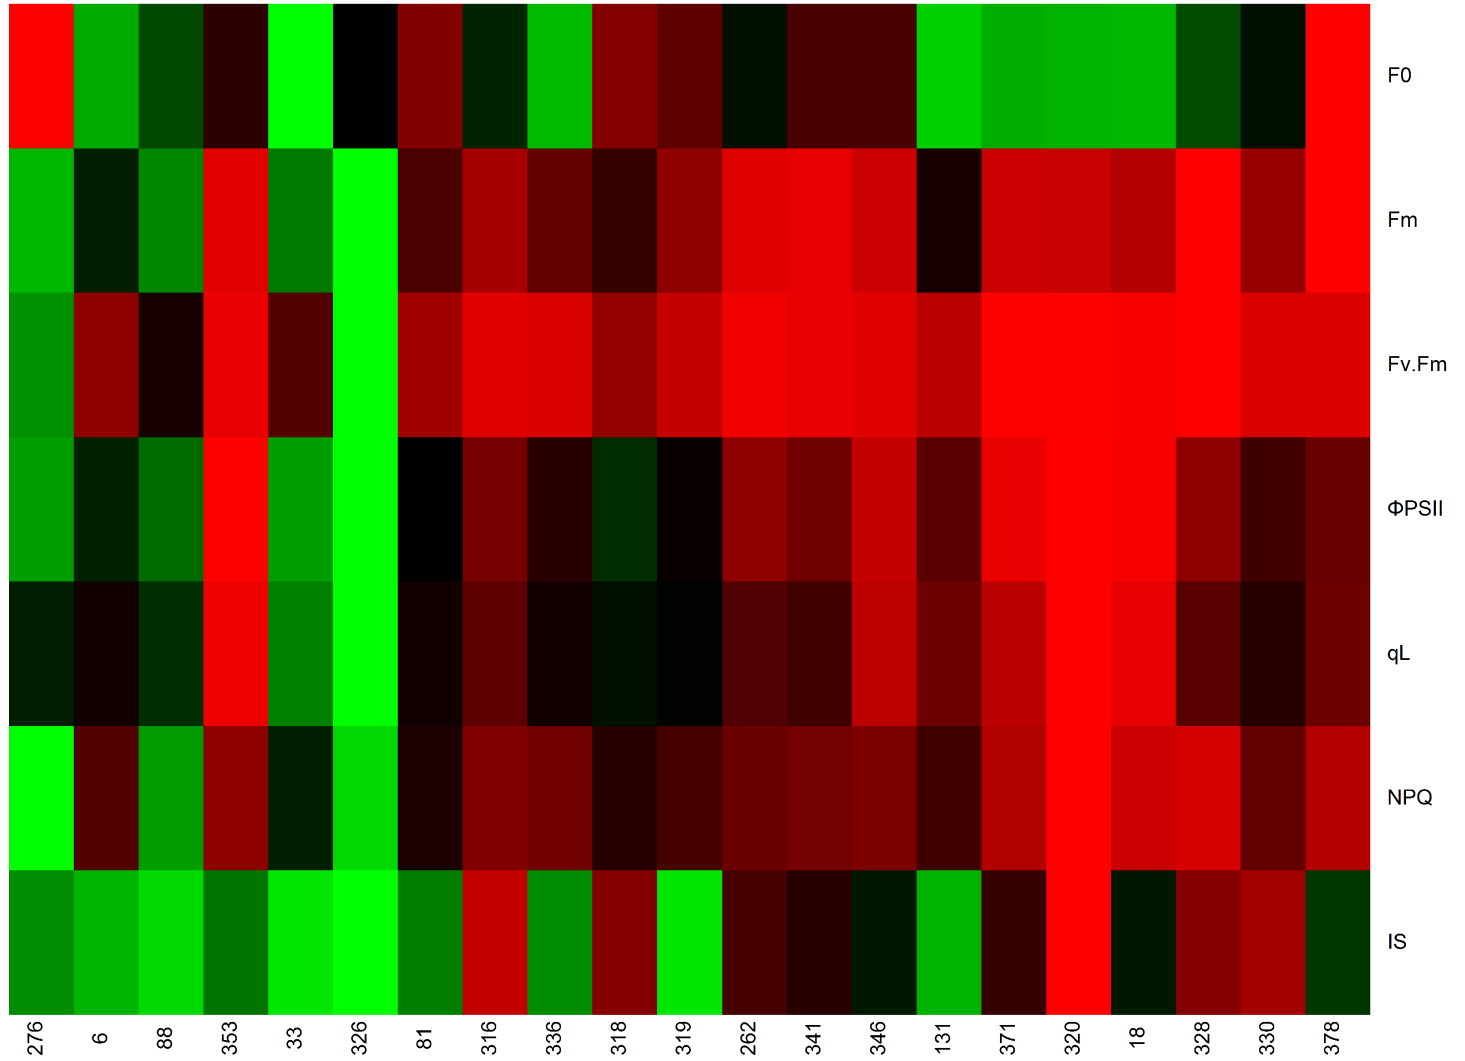

# Admix

## Color Key

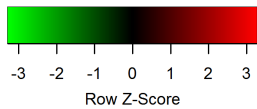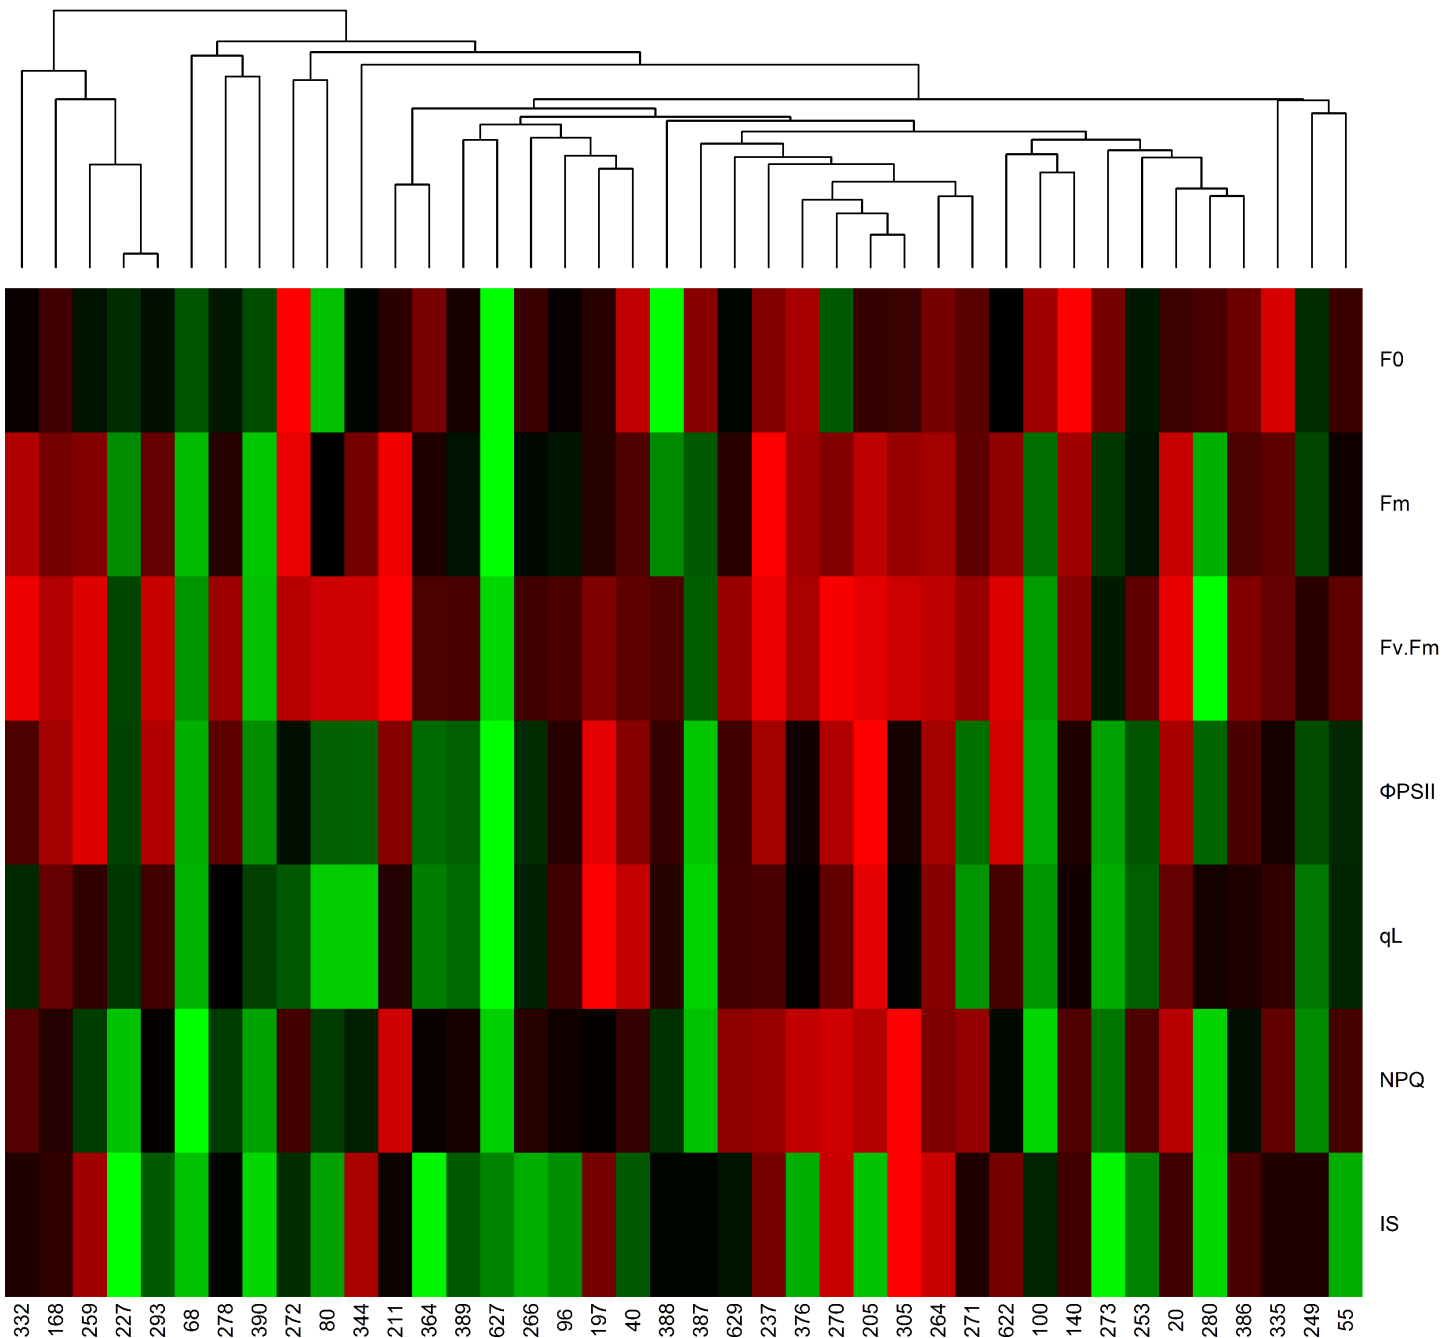

Supplement: 12870_2019_1983_MOESM9_ESM.pdf [file 12870_2019_1983_MOESM9_ESM.pdf]
